# Supplementary material for: Survival in People Living with HIV with or without Recurrence of Hepatocellular Carcinoma after Invasive Therapy
Source: MDPI journal article supplement (doi:10.3390/cancers15061653), 2023-03-08
Supplement: s1 [file s1]

**Table S2 Supplemental.** Characteristics of PLWH at invasive therapy according to the outcome recurrence

| Variable                           |         | Overall<br>(number=41) | RE<br>(number=19)   | No-RE<br>(number=22) | P-value |
|------------------------------------|---------|------------------------|---------------------|----------------------|---------|
| First therapy                      |         |                        |                     |                      | 0.171   |
|                                    | OLT     | 9 (22.0)               | 2 (10.5)            | 7 (31.8)             |         |
|                                    | LR      | 6 (14.6)               | 4 (21.1)            | 2 (9.1)              |         |
|                                    | RFTA    | 7 (17.1)               | 5 (26.3)            | 2 (9.1)              |         |
|                                    | CRE     | 19 (46.3)              | 8 (42.1)            | 11 (50.0)            |         |
| Days to therapy from diagnosis     |         | 57 (27 - 218)          | 35 (15 - 122)       | 109 (31 - 327)       | 0.097   |
| Years to recurrence from diagnosis |         | 1.34 (0.56 - 3.04)     | 1.34 (0.56 - 3.04)  | . (. - .)            | <0.0001 |
| Days to death from recurrence      |         | 336 (233.5 - 566.5)    | 336 (233.5 - 566.5) | . (. - .)            | <0.0001 |
| AFP, ng/mL                         |         | 22.6 (7.7 - 216.2)     | 78.6 (16.15 - 370)  | 11.1 (5.5 - 46.3)    | 0.101   |
| AFP, ng/mL                         |         |                        |                     |                      | 0.182   |
|                                    | <28.8   | 20 (57.1)              | 7 (43.8)            | 13 (68.4)            |         |
|                                    | ≥28.8   | 15 (42.9)              | 9 (56.3)            | 6 (31.6)             |         |
|                                    |         |                        |                     |                      |         |
| AST, U/L                           |         | 58.5 (32.5 - 130.5)    | 52.5 (36 - 83)      | 58.5 (28 - 176)      | 0.625   |
| ALT, U/L                           |         | 43 (28 - 96)           | 45 (29 - 83)        | 39 (28 - 96)         | 0.832   |
| Bilirubin, mg/dL                   |         | 0.9 (0.57 - 2.07)      | 0.9 (0.6 - 1.64)    | 0.98 (0.51 - 2.3)    | 0.807   |
| PCHE, KU/L                         |         | 6.17 (3.75 - 7.91)     | 6.2 (4.19 - 6.79)   | 5.98 (3.75 - 8.12)   | 0.592   |
| CD4 cells count, mmc               |         | 368 (249.5 - 561)      | 420 (231 - 610)     | 350 (282 - 512)      | 0.838   |
| CD8 cells count, mmc               |         | 552 (379.5 - 915)      | 412 (311 - 716)     | 669.5 (385 - 942)    | 0.206   |
| CD4/CD8 ratio                      |         | 0.65 (0.38 - 1.01)     | 0.65 (0.38 - 1.17)  | 0.64 (0.37 - 0.83)   | 0.568   |
| Neutrophils, 10 <sup>9</sup> /L    |         | 3.8 (2.6 - 4.7)        | 2.95 (2.3 - 4.2)    | 4.55 (2.9 - 5.4)     | 0.04    |
| Lymphocytes, 10 <sup>9</sup> /L    |         | 1.35 (0.9 - 2.1)       | 1 (0.7 - 2.1)       | 1.55 (1 - 2.2)       | 0.127   |
| Neutrophils/lymphocytes ratio      |         | 2.46 (1.43 - 4.53)     | 1.85 (1.35 - 7.33)  | 2.63 (1.77 - 3.9)    | 0.743   |
| Platelets, 10 <sup>9</sup> /L      |         | 129.5 (83 - 189.5)     | 110 (79 - 150)      | 151.5 (96 - 240)     | 0.248   |
| Creatinine, mg/dL                  |         | 0.95 (0.78 - 1.2)      | 0.82 (0.71 - 1.08)  | 1.01 (0.83 - 1.48)   | 0.018   |
| PTs/INR                            |         | 1.07 (1 - 1.15)        | 1.11 (1.05 - 1.15)  | 1.03 (0.99 - 1.17)   | 0.137   |
| HIV-RNA, copies/mL                 |         | 377 (126 - 19621)      | 550 (204 - 12170)   | 111 (65 - 27071)     | 0.371   |
| HIV-RNA, ≥50copies/mL              |         | 8 (19.5)               | 5 (26.3)            | 3 (13.6)             | 0.144   |
|                                    | Unknown | 2 (4.9)                | 2 (10.5)            | 0 (0)                |         |

Results are described by median (IQR) or frequency (%). Abbreviations: RE:recurrence; No-RE: no recurrence; ART: antiretroviral therapy; IVDU: intravenous drug users; MSM: aman who have sex with a man; FU: follow up; AFP: alpha phetoprotein; PTs/INR: prothrombin, second/international normalized ratio; AST: aspartate aminotransferase (normal values <35 IU/L); ALT: alanine aminotransferase (normal values <59 IU/L); PCHE: pseudocholinesterase; HCV: hepatitis C virus; HBsAg: hepatitis B surface antigen.
