# Supplementary material for: Survival in People Living with HIV with or without Recurrence of Hepatocellular Carcinoma after Invasive Therapy
Source: MDPI journal article supplement (doi:10.3390/cancers15061653), 2023-03-08
Supplement: s1 [file s1]

Table S3 Supplemental. Biochemistry at last evaluation of PLWH who received invasive therapy according to the outcome recurrence.

| Variable                          |       | Overall<br>(number=41) | RE<br>(number=19)   | No-RE<br>(number=22) | P-value |
|-----------------------------------|-------|------------------------|---------------------|----------------------|---------|
| AFP, ng/mL                        |       | 13.2 (2.7 - 333.2)     | 35.6 (2.4 - 3066.4) | 13.2 (2.9 - 31.9)    | 0.545   |
| AFP, ng/mL                        |       |                        |                     |                      | 0.203   |
|                                   | <28.8 | 24 (61.5%)             | 9 (50%)             | 15 (71.4%)           |         |
|                                   | ≥28.8 | 15 (38.5%)             | 9 (50%)             | 6 (28.6%)            |         |
| AST, U/L                          |       | 43 (25 - 80)           | 43 (18 - 79)        | 42 (28 - 96)         | 0.388   |
| ALT, U/L                          |       | 58 (32 - 158)          | 68 (25 - 123)       | 57.5 (32 - 176)      | 0.619   |
| Bilirubin, mg/dL                  |       | 1.05 (0.67 - 1.94)     | 0.87 (0.7 - 1.67)   | 1.51 (0.58 - 2.09)   | 0.228   |
| PCHE, KU/L                        |       | 5.66 (2.92 - 8.04)     | 4.95 (2.57 - 6.57)  | 5.98 (3.75 - 8.46)   | 0.136   |
| CD4 cells count,<br>mmc           |       | 343 (215 - 497)        | 320 (183 - 433)     | 374 (265 - 512)      | 0.245   |
| CD8 cells count,<br>mmc           |       | 0.7 (0.41 - 0.89)      | 0.77 (0.42 - 1.06)  | 0.66 (0.4 - 0.89)    | 0.657   |
| CD4/CD8 ratio                     |       | 546 (329 - 852)        | 449 (242 - 686)     | 645 (385 - 916)      | 0.062   |
| Neutrophils, 10 <sup>9</sup> /L   |       | 3.9 (2.9 - 5.4)        | 3.3 (2.8 - 4.1)     | 4.1 (3.4 - 6.5)      | 0.137   |
| Lymphocytes, 10 <sup>9</sup> /L   |       | 1.5 (0.9 - 2)          | 1.1 (0.8 - 2)       | 1.7 (1 - 2.2)        | 0.119   |
| Neutrophils/<br>lymphocytes ratio |       | 2.67 (2 - 4.2)         | 2.91 (2.2 - 4.2)    | 2.19 (1.77 - 3.9)    | 0.364   |
| Platelets, 10 <sup>9</sup> /L     |       | 151 (100 - 248)        | 150 (100 - 264)     | 153 (96 - 240)       | 0.824   |
| Creatinine, mg/dL                 |       | 1.02 (0.83 - 1.38)     | 1.02 (0.81 - 1.38)  | 1.02 (0.83 - 1.57)   | 0.638   |
| PTs/INR                           |       | 1.1 (1.03 - 1.19)      | 1.09 (1.03 - 1.22)  | 1.1 (1.04 - 1.16)    | 0.891   |
| HIV-RNA,<br>copies/mL             |       | 88 (64 - 12170)        | 64 (62 - 12170)     | 11 (65 - 27071)      | 0.383   |
| HIV-RNA,<br>≥50copies/mL          |       | 6 (14.6%)              | 3 (15.8%)           | 3 (13.6%)            | 0.846   |

Results are described by median (IQR) or frequency (%). Abbreviations: n: number; ART: antiretroviral therapy; IVDU: intravenous drug users; MSM: a man who have sex with a man; FU: follow up; AFP: alpha phetoprotein; PTs/INR: prothrombin, second/international normalized ratio; AST: aspartate aminotransferase (normal values <35 IU/L); ALT: alanine aminotransferase (normal values <59 IU/L); PCHE: pseudocholinesterase; HCV: hepatitis C virus; HBsAg: hepatitis B surface antigen.
