# Supplementary material for: Survival in People Living with HIV with or without Recurrence of Hepatocellular Carcinoma after Invasive Therapy
Source: MDPI journal article supplement (doi:10.3390/cancers15061653), 2023-03-08
Supplement: s1 [file s1]

**Table S1** Supplemental. Characteristics at baseline evaluation (HCC diagnosis) of PLWH who received invasive therapy according to the outcome recurrence.

| Variable                        |              | Overall<br>(number=41) | RE<br>(number=19)     | No-RE<br>(number=22)  | P-value |
|---------------------------------|--------------|------------------------|-----------------------|-----------------------|---------|
| Age (years)                     |              | 53 (49 - 56)           | 54.6 (49.5 - 57.5)    | 52 (47.7 - 56)        | 0.314   |
| Sex, male                       |              | 34 (82.9)              | 13 (68.4)             | 21 (95.5)             | 0.036   |
|                                 |              |                        |                       |                       |         |
| Years of HIV infection          |              | 22.7 (12.7 - 26.4)     | 24.7 (10.9 - 28.3)    | 21.3 (12.7 - 25.3)    | 0.327   |
| Years since first ART           |              | 11.9 (7.3 - 16.9)      | 10.7 (3.72 - 17.91)   | 12.5 (8.8 - 16.7)     | 0.745   |
| HIV risk factor                 |              |                        |                       |                       | 0.658   |
|                                 | Heterosexual | 4 (9.8)                | 3 (15.8)              | 1 (4.5)               |         |
|                                 | IVDU         | 22 (53.7)              | 9 (47.4)              | 13 (59.1)             |         |
|                                 | MSM          | 4 (9.8)                | 2 (10.5)              | 2 (9.1)               |         |
|                                 | Unknown      | 11 (26.8)              | 5 (26.3)              | 6 (27.3)              |         |
| Time to FU, years               |              | 4 (1.1 - 7)            | 4.5 (1.4 - 8.6)       | 2.7 (0.8 - 6.3)       | 0.302   |
| N. of nodules >3                |              | 3 (2 - 4)              | 2.6 (2 - 3.5)         | 3 (2.3 - 4)           | 0.487   |
| Cancer embolus in portal vein   | No           | 29 (70.7)              | 14 (73.7)             | 15 (68.2)             | 1.000   |
|                                 | Yes          | 12 (29.3)              | 5 (26.3)              | 7 (31.8)              |         |
| Extra-hepatic                   | No           | 37 (90.2)              | 17 (89.5)             | 20 (90.9)             | 0.729   |
|                                 | Yes          | 4 (9.8)                | 2 (10.5)              | 2 (9.1)               |         |
| AFP, median, ng/mL              |              | 27.8 (8.7 - 135.2)     | 29.6 (18.3 - 256)     | 14.85 (8.5 - 99.9)    | 0.293   |
| AFP, ng/mL                      |              |                        |                       |                       | 0.330   |
|                                 | <28.8        | 19 (51.4)              | 7 (41.2)              | 12 (60)               |         |
|                                 | ≥28.8        | 18 (48.6)              | 10 (58.8)             | 8 (40)                |         |
| AST, U/L                        |              | 70 (34 - 100)          | 43 (33 - 100)         | 70.5 (36 - 103.5)     | 0.64    |
| ALT, U/L                        |              | 67 (33 - 99)           | 54 (26 - 93)          | 68 (40.5 - 99.5)      | 0.358   |
| Bilirubin, mg/dL                |              | 1 (0.78 - 1.75)        | 0.97 (0.78 - 1.75)    | 1.02 (0.83 - 1.59)    | 0.903   |
| PCHE, KU/L                      |              | 5.07 (3.03 - 6.66)     | 4.13 (3.03 - 7.95)    | 5.3 (2.14 - 6.61)     | 0.896   |
| Albumin, g/L                    |              | 39.9 (37.26 - 41.11)   | 40.92 (37.26 - 42.89) | 39.11 (33.78 - 40.88) | 0.353   |
| CD4 cells count, mmc            |              | 433 (262 - 722)        | 539 (341 - 785)       | 345 (262 - 614)       | 0.369   |
| CD8 cells count, mmmc           |              | 732 (445 - 1209)       | 679 (415.5 - 1147)    | 757 (449 - 1209)      | 0.935   |
| CD4/CD8 ratio                   |              | 0.68 (0.34 - 0.98)     | 0.74 (0.42 - 1.07)    | 0.51 (0.31 - 0.98)    | 0.28    |
| Neutrophils, 10 <sup>9</sup> /L |              | 2.85 (2.4 - 3.4)       | 2.8 (1.85 - 3.35)     | 2.85 (2.4 - 3.5)      | 0.492   |
| Lymphocytes, 10 <sup>9</sup> /L |              | 1.7 (1.2 - 2.6)        | 1.85 (1.1 - 2.6)      | 1.6 (1.4 - 2.4)       | 0.985   |
| Neutrophils/lymphocytes ratio   |              | 1.58 (1.12 - 2.14)     | 1.36 (1.06 - 1.85)    | 1.87 (1.23 - 2.36)    | 0.285   |

| Variable                      |         | Overall<br>(number=41) | RE<br>(number=19)  | No-RE<br>(number=22) | P-value |
|-------------------------------|---------|------------------------|--------------------|----------------------|---------|
| Platelets, 10 <sup>9</sup> /L |         | 107 (64 - 141)         | 102 (63 - 124)     | 108.5 (75 - 152)     | 0.528   |
| PTs/INR                       |         | 1.06 (1.03 - 1.28)     | 1.06 (1.06 - 1.28) | 1.08 (0.99 - 1.14)   | 0.721   |
| Creatinine, mg/dL             |         | 0.74 (0.68 - 0.86)     | 0.81 (0.68 - 1.03) | 0.73 (0.68 - 0.79)   | 0.279   |
| Anti-HCV positive             |         | 32 (78)                | 13 (68.4)          | 19 (86.4)            | 0.332   |
| HBsAg positive                |         | 8 (19.5)               | 5 (26.3)           | 3 (13.6)             | 0.562   |
| HIV-RNA,<br>copies/mL         |         | 2363 (1079 - 14948)    | 2363 (1900 - 2825) | 13665 (258 - 27071)  | 0.999   |
| HIV-RNA,<br>≥50copies/mL      |         | 4 (9.8)                | 2 (10.5)           | 2 (9.1)              | 0.917   |
|                               | Unknown | 14 (34.1)              | 7 (36.8)           | 7 (31.8)             |         |

Results are described by median (IQR) or frequency (%). Abbreviations: n: number; ART: antiretroviral therapy; IVDU: intravenous drug users; MSM: a man who have sex with a man; FU: follow up; AFP: alpha phetoprotein; PTs/INR: prothrombin, second/international normalized ratio; AST: aspartate aminotransferase (normal values <35 IU/L); ALT: alanine aminotransferase (normal values <59 IU/L); PCHE: pseudocholinesterase; HCV: hepatitis C virus; HBsAg: hepatitis B surface antigen.
